# Supplementary material for: Role of Aspartic and Polyaspartic Acid on the Synthesis and Hydrolysis of Brushite
Source: MDPI journal article supplement (doi:10.3390/jfb10010011), 2019-02-01
Supplement: s1 [file s1]

## Role of aspartic and polyaspartic acid on the synthesis and hydrolysis of brushite.

Katia Rubini, Elisa Boanini and Adriana Bigi

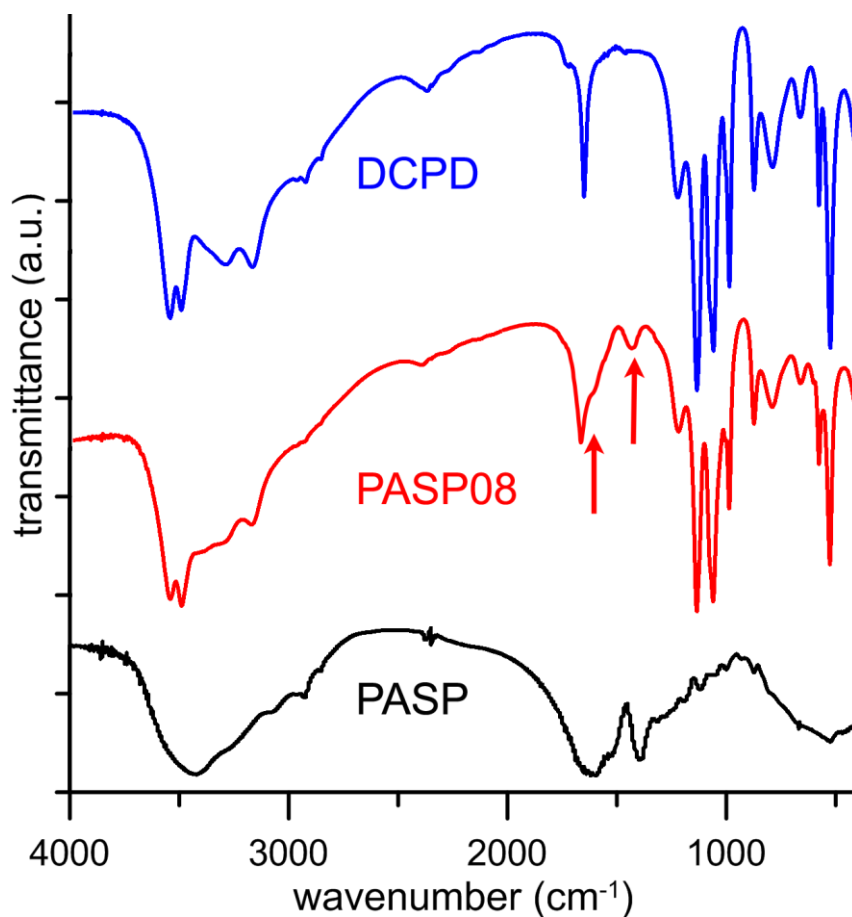

**Figure S1:** FT-IR spectra of the DCPD and PASP08 synthesized samples, compared with that of PASP powder.

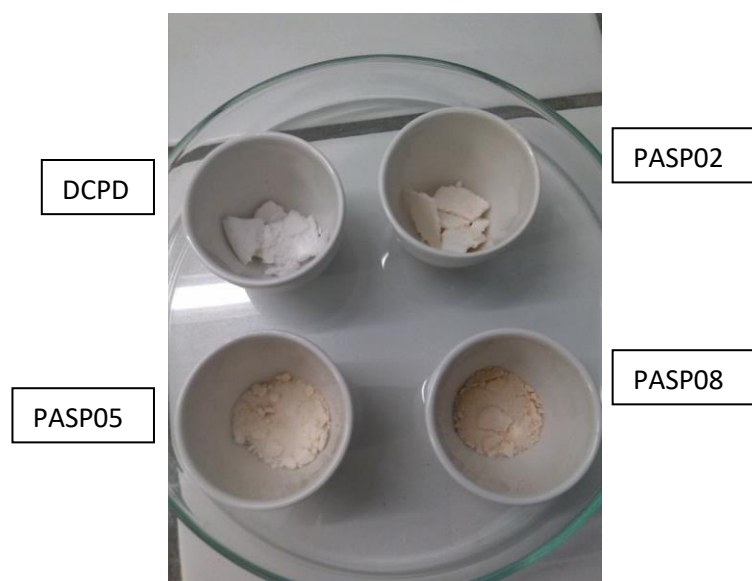

**Figure S2:** picture of the samples obtained from the synthesis of DCPD in the presence of increasing concentrations of PASP after heat treatment at 300 °C. Powders display a pale yellow color, which becomes darker on passing from PASP02 to PASP08, due to the partial combustion of organic material and residual C remains.

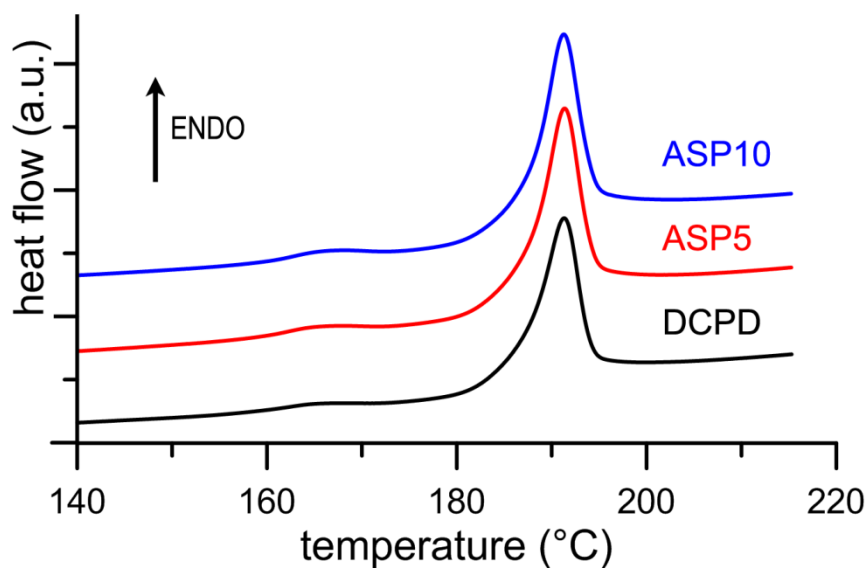

**Figure S3:** DSC plots showing the thermal behavior of the products obtained from the synthesis of DCPD in the presence of increasing concentrations of ASP.

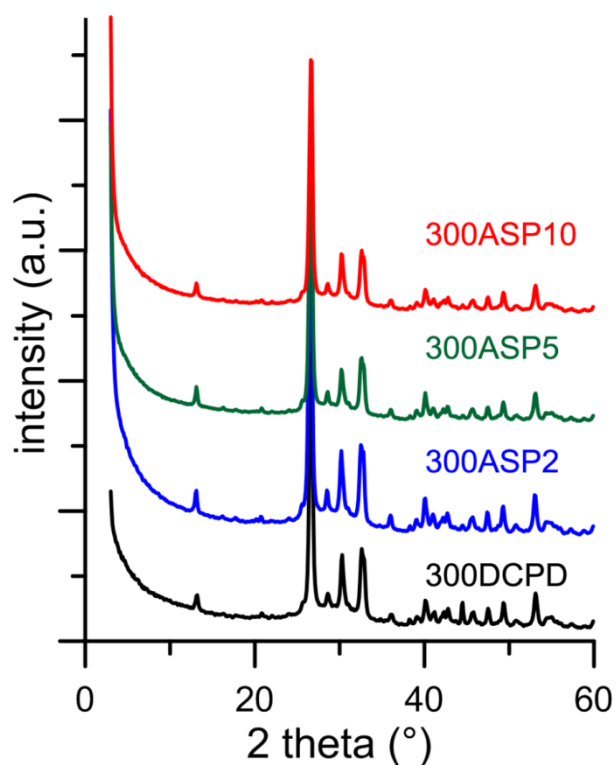

**Figure S4:** Powder X-ray diffraction patterns of the products obtained from the synthesis of DCPD in the presence of increasing concentrations of ASP after heat treatment at 300 °C.

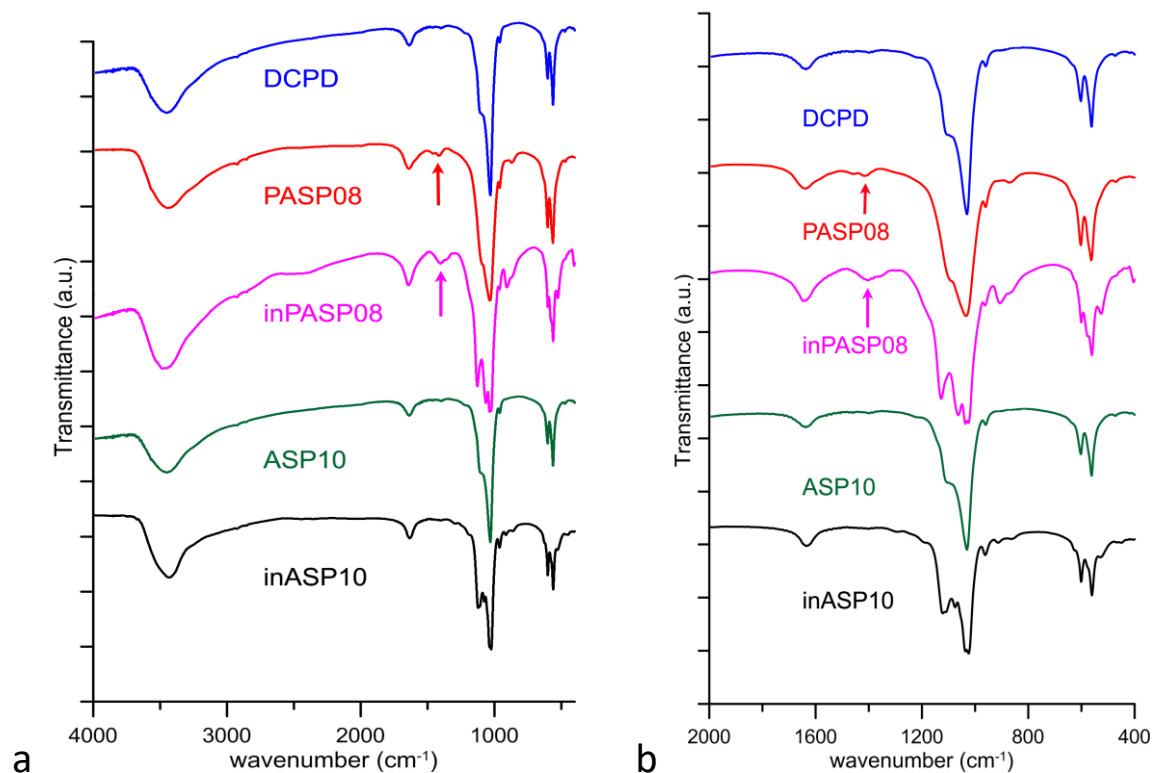

**Figure S5:** (a) FT-IR spectra of the different samples after 3 days of hydrolysis at 60°C; (b) enlargement of the 400-2000 cm<sup>-1</sup> part of the spectra.
